# Supplementary material for: Combination of platelet-rich plasma and bone marrow mesenchymal stem cells enhances tendon–bone healing in a rabbit model of anterior cruciate ligament reconstruction
Source: PubMed Central journal article supplement (PMC5015347; doi:10.1186/s13018-016-0433-7), 2016-09-07
Supplement: 13018_2016_433_MOESM1_ESM.pdf [file 13018_2016_433_MOESM1_ESM.pdf]

### Results of biomechanical test

| group     |   | Failure load (N) | Deformation (mm) | Stiffness (N/mm) |
|-----------|---|------------------|------------------|------------------|
| control   | 1 | 15.74            | 8.02             | 1.96             |
|           | 2 | 18.74            | 4                | 4.69             |
|           | 3 | 20.82            | 3.1              | 6.72             |
|           | 4 | 20.4             | 6.95             | 2.94             |
|           | 5 | 22.11            | 6.72             | 3.29             |
| PRP       | 1 | 24.69            | 4.4              | 5.61             |
|           | 2 | 23.07            | 5                | 4.61             |
|           | 3 | 24.83            | 8.3              | 2.99             |
|           | 4 | 22.61            | 4.62             | 4.89             |
|           | 5 | 25.21            | 6                | 4.2              |
| BMSCs+PRP | 1 | 30.81            | 4.69             | 6.57             |
|           | 2 | 31.62            | 14.15            | 2.23             |
|           | 3 | 37.98            | 6.91             | 5.5              |
|           | 4 | 50.84            | 7.02             | 7.24             |
|           | 5 | 29.87            | 5.77             | 5.18             |
